# Supplementary figures and images for: Protein Kinase C θ Activation Induces Insulin-Mediated Constriction of Muscle Resistance Arteries
Source: Oxford University Press journal article supplement (doi:10.2337/db07-0792), 2007-12-18

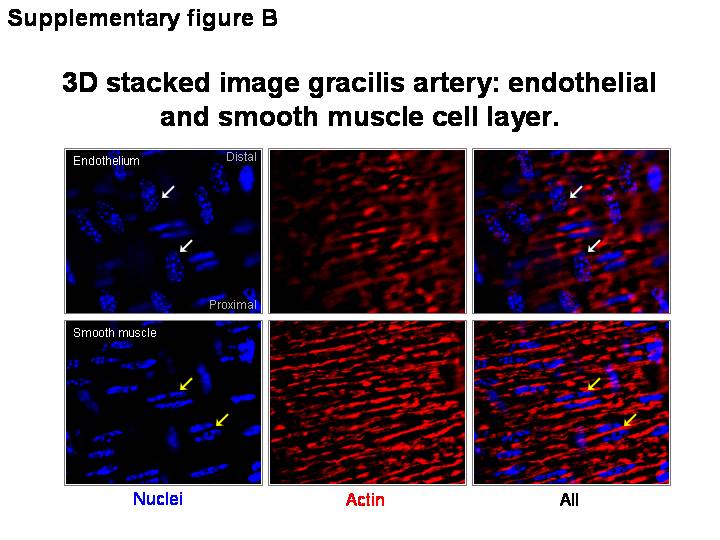


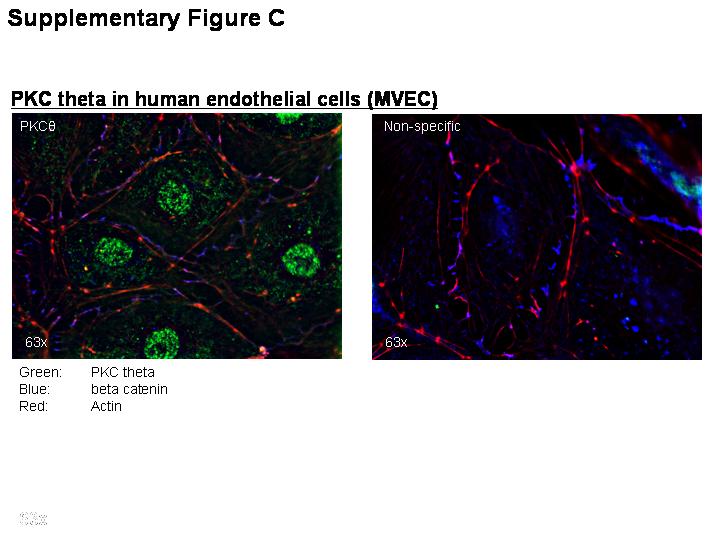

Supplement: db070792-sup-supplementaryfiguresbc.doc [file db070792-sup-supplementaryfiguresbc.doc]
